# Supplementary material for: Identification of the EdcR Estrogen-Dependent Repressor in Caenibius tardaugens NBRC 16725: Construction of a Cellular Estradiol Biosensor
Source: MDPI journal article supplement (doi:10.3390/genes12121846), 2021-11-23
Supplement: s1 [file s1]

**Table S1.** Primers used in this study. Restriction enzymes used for cloning are shown in brackets.

| Primers                    | Sequence (5'-3')                             | Use                                                                                                                                        |
|----------------------------|----------------------------------------------|--------------------------------------------------------------------------------------------------------------------------------------------|
| 5BamHIREG1UPf              | CATACGGATCCTCGAGCTTGCGGAAATAGGG              | <i>EGO55_13520</i> deletion (amplification of upstream region) ( <i>Bam</i> HI/ <i>Sall</i> )                                              |
| 3SallIREG1UPr              | CACAGTCGACATGGGTTAGGCAGGGCATC                |                                                                                                                                            |
| 5SallIREG1DOWNf            | CACAGTCGACTTGTGATGGTGCGCGTGATC               | <i>EGO55_13520</i> deletion (amplification of upstream region) ( <i>Sall</i> / <i>Hind</i> III)                                            |
| 3HindIIREG1DOWNr           | ACATAAGCTTCCGAAGTATGCACCTGCTGA               |                                                                                                                                            |
| F24                        | CGCCAGGGTTTTCCCAGTCACGAC                     | Internal primer: used to check insert cloning in pK18mobsacB and to check insertion of pK18mobsacB                                         |
| R24                        | AGCGGATAACAATTTACACAGGA                      |                                                                                                                                            |
| extREGf                    | TCGATAAAGGCCTTGCGCAA                         | External primer. Together with F24 used to check insertion of pK18edcR. Together with extREGr used to check <i>EGO55_13520</i> deletion    |
| extREGr                    | TGATCCTCAACCGTGTTCCG                         | External primer. Together with R24 used to check insertion of pK18edcR. Together with extREGf used to check <i>EGO55_13520</i> deletion    |
| T0pSEVA237F                | CCGAGCGTTCTGAACAAATCC                        | Internal primer: Together with R24, used to check insert cloning in pSEVA237 <i>PlexA</i> . Hybridizes in T0 terminator                    |
| 3SEQIntRegGFP              | ACATTTAATTAACTCCAGTGAAAAGTTCTTCTCCT          | Internal primer: Together with R24, used to check insert cloning in pSEVA237 <i>PlexA</i> . Hybridizes in <i>gfp</i> gene                  |
| 5BamHICOMPReg2f            | ATACGGATCCAGGAGGAAACATTTGGCGAATGAACTGAAGGCTG | Cloning <i>EGO55_13520</i> into pSEVA237 <i>PlexA</i> ( <i>Bam</i> HI/ <i>Spe</i> I)                                                       |
| 3SpeIOMPReg2r              | CACATACTAGTTCAGGCCGCGCTGGAA                  |                                                                                                                                            |
| 5EcoRIStopIntRegF          | ACATGAATTCCTAGGCAGCACCATCCGCC                | Cloning <i>P<sub>a</sub></i> promoter into pSEVA237 <i>PlexA</i> ( <i>Eco</i> RI/ <i>Sall</i> )                                            |
| 3SallIntRegR               | ACATGTCGACGGTTGCGCGCCGGAGT                   |                                                                                                                                            |
| 5EcoRIStopIntReg1f         | ATATCGAATTCCTAATCGTCGTAGATGGCGGAAAC          | Cloning <i>P<sub>b</sub></i> promoter into pSEVA237 <i>PlexA</i> ( <i>Eco</i> RI/ <i>Sall</i> )                                            |
| 3SallIntReg1r              | ACATGTCGACAAAAACGCACTTTGATACATTGGT           |                                                                                                                                            |
| 5PacI <i>PlexA</i> tetRT0f | ACATTTAATTAAAGCGGATAACAATTTACACACAG          | Cloning <i>EGO55_13520</i> gen together with <i>P<sub>lexA</sub></i> promoter form pSEVA23edcR into pSEVA651 ( <i>Pac</i> I/ <i>Spe</i> I) |
| 3SpeIOMPReg2r              | CACATACTAGTTCAGGCCGCGCTGGAA                  |                                                                                                                                            |
| 5RTRecAf                   | CGATCGACGTGCTGGTGATC                         | RT-PCR, <i>EGO55_01665</i> ( <i>recA</i> ) amplification                                                                                   |
| 3RTRecAr                   | TGCGGACCTGGTTGATGAAA                         |                                                                                                                                            |
| 5RTCoASynf                 | CCTGCTTCTGGCTGACGATG                         | RT-PCR, <i>EGO55_13555</i> amplification                                                                                                   |
| 3RTCoASynr                 | TGTCGACGATTTCTCTGCA                          |                                                                                                                                            |
| 5RTTonBf                   | ACTCGTCCGATACCGTTTCG                         | RT-PCR, <i>EGO55_13600</i> ( <i>edcT</i> ) amplification                                                                                   |
| 3RTTonBr                   | TGTGTTGCGACCATAGAGCG                         |                                                                                                                                            |
| 5RTDioxf                   | CGCTATCTTGGGCTGGAGG                          | RT-PCR, <i>EGO55_13570</i> ( <i>edcB</i> ) amplification                                                                                   |
| 3RTDioxr                   | CGATATCCGGTCGTCACCAG                         |                                                                                                                                            |

**Figure S1.** Nucleotide sequence of pSEVA237MPb. Hybridization sequences of oligonucleotides used to clone *P<sub>b</sub>* into pSEV237 backbone are underlined. Scars left after ligation of *P<sub>b</sub>* promoter fragment into pSEVA237M-BCD2 backbone are shown in bold. The synthetic bicistronic RBS, BCD2, is shown in italics.

**TTAATTAA**AGCGGATAACAATTTACACAGGAGGCCGCTAGGCTAATCGTTCGTAGATGGCGGAAACCGCGGCGGGATTCT  
 GTTCGCATGCCCTGACAGCGGAAGTAGGAAAGCGGTTCGTTCGCATAACGCCCCGACGGAGCGCTGCAGCGCGTCTCTGCTCTT  
 CCGATATGCTGAGGTCCATCCCGCTCTTCTCCCATCCGGTTGCGCGCCGGAGTTGCCATTAACGAAACTGTCCGTACCTAT  
 AAAATTTCTGTCTGTCCAGCCCTGTGTTTCATGGCACAATCTGCTGGCCGGGTCTCTTGACTCCTAATAACAGTACCAATAG  
TATCGAAAGTTCGTTTTTTTGGATCC**TCTAGG**GCCCAAGTTCACTTAAAAAGGAGATCAACAATGAAAGCAATTTTCGTACT  
GAAACATCTTAATCATGCTAAGGAGGTTTTCTAATGATCATGGGAATTCATAAAGGTGAAGAACTGTTACCCGGTGTGTT  
 CCGATCCTGGTTGAACTGGATGGTGATGTTAACGGCCACAAATCTCTGTTCTGGTGAAGGTGAAGGTGATGCAACCAAC  
 GGTAAACTGACCCTGAAATTCATCTGCACTACCGGTAACTGCCGGTTCCATGGCCGACTCTGGTGACTACCCTGACCTAT  
 GGTGTTTCAGTGTTTTTCTCGTTACCCGGATCACATGAAGCAGCATGATTTCTTCAAATCTGCAATGCCGGAAGGTTATGTA  
 CAGGAGCGCACCATTTCTTTCAAAGACGATGGCACCTACAAAACCCGTGCAGAGGTTAAATTTGAAGGTGATACTCTGGTG  
 AACCGTATTGAACTGAAAGGCATTGATTTCAAAGAGGACGGCAACATCCTGGGCCACAACTGGAATATAACTTCAACTCC  
 CATAACGTTTACATCACCGCAGACAAACAGAAGAACGGTATCAAAGCTAACTTCAAATTCGCCATAACGTTGAAGACGGT  
 AGCGTACAGCTGGCGGACCACTACCAGCAGAACACTCCGATCGGTGATGGTCCGGTCTGCTGCCGATAACCACTACCTG  
 TCCACCCAGTCTAACTGTCCAAAGACCCGAACGAAAAGCGCGACCACATGGTGCTGCTGGAGTTCGTTACTGCAGCAGGT  
 ATCACGCACGGCATGGATGAACTCTACAAATAAGAATTCGAGCTCGGTACCCGGGGATCCTCTAGAGTCGACCTGCAGGCA  
 TGCAAGCTTGCGGCCGCGTCGTGACTGGGAAAACCTGGCGACTAGTCTTGACTCCTGTTGATAGATCCAGTAATGACCT  
 CAGAACTCCATCTGGATTTGTTTCAGAACGCTCGGTTGCCGCCGGGCGTTTTTTATTGGTGAGAATCCAGGGGTCCCCAATA  
 ATTACGATTTAAATTTGTGTCTCAAATCTCTGATGTTACATTGCACAAGATAAAAAATATATCATCATGAACAATAAACT  
 GTCTGCTTACATAAACAGTAATACAAGGGGTGTTATGAGCCATATTAGCGTGAAACGAGCTGTAGCCGTCCGCGTCTGAA  
 CAGCAACATGGATGCGGATCTGTATGGCTATAAATGGGCGCGTGATAACGTGGGTGAGAGCGGCGGACCATTTATCGTCT  
 GTATGGCAAACCGGATGCGCCGGAAGTGTCTGAAACATGGCAAAGGCAGCGTGGCGAACGATGTGACCGATGAAATGGT  
 GCGTCTGAACTGGCTGACCGAATTTATGCCGCTGCCGACCATTAAACATTTTATTTCGCACCCCGGATGATGCGTGGCTGCT  
 GACCACCGCGATTCCGGGCAAAACCGCGTTTTAGGTGCTGGAAGAATATCCGGATAGCGGCGAAAACATTGTGGATGCGCT  
 GGCCGTGTTTCTGCGTCTGTCATAGCATTCCGGTGTGCAACTGCCCGTTTAAACAGCGATCGTGTGTTTCTGCTGCCCCA  
 GGCGCAGAGCCGATGAACAACGGCCTGGTGGATGCGAGCGATTTTGATGATGAACGTAACGGCTGGCCGGTGGAAACAGGT  
 GTGGAAGAAATGCATAAACTGCTGCCGTTTAGCCCGGATAGCGTGGTGACCCACGGCGATTTTAGCCTGGATAACCTGAT  
 TTTTCGATGAAGGCAAACTGATTGGCTGCATTGATGTGGGCGGTGTGGGCATTGCGGATCGTTATCAGGATCTGGCCATTCT  
 GTGGAAGTGCCTGGGCGAATTTAGCCCGAGCCTGCAAAAACGTCTGTTTCAGAAAATATGGCATTGATAATCCGGATATGAA  
 CAAACTGCAATTTTCATCTGATGCTGGATGAATTTTTCTAATAATTAATTGGACCGCGGTCCGCGCGTTGTCTTTTCCGCT  
 GCATAACCTGCTTCGGGGTCATTATAGCGATTTTTTTCGGTATATCCATCCTTTTTTCGCACGATATACAGGATTTTGCCAA  
 AGGGTTTCGTGTAGACTTTTCTTGGTGTATCCAACGGCGTCAGCCGGGCGAGGATAGGTGAAGTAGGCCACCCGCGAGCGGG  
 TGTTCTTTCTTCACTGTCCCTTATTTCGCACCTGGCGGTGCTCAACGGGAATCCTGCTCTGCGAGGCTGGCCGTAGGCCGGC  
 CCTACCGGCGCGGCGAGCGTTACCCGTGTGCGCGGCTCCAACGGCTCGCCATCGTCCAGAAAACACGGCTCATCGGGCATCG  
 GCAGGCGCTGCTGCCCCGCGCGTTCCCATTCCTCCGTTTTCGGTCAAGGCTGGCAGGTCTGGTTCCATGCCCGGAATGCCGG  
 GCTGGCTGGGCGGCTCCTCGCCGGGGCCGGTTCGGTAGTTGCTGCTCGCCCGGATACAGGTCGGGATGCGGCGCAGGTGCG  
 CATGCCCCAACAGCGATTTCGTCTGGTTCGTGATCAACCACCACGGCGGCACTGAACACCGACAGGCGCAACTGGTCGC  
 GGGGCTGGCCCCACGCCACGCGGTTCATTGACCACGTAGGCCGACACGGTGCCGGGGCCGTTGAGCTTCACGACGGAGATCC  
 AGCGCTCGGCCACCAAGTCCTTGACTGCGTATTGGACCGTCCGCAAAGAACGTCCGATGAGCTTGGAAGTGTCTTCTGGC  
 TGACCACCACGGCGTTCTGGTGGCCCATCTGCGCCACGAGGTGATGCAGCAGCATTGCCGCGGTGGGTTTCTTCGCAATAA  
 GCCCGGCCCACGCCTCATGCGCTTTGCGTTCCGTTTGACCCAGTGACCGGGCTTGTCTTGGCTTGAATGCCGATTTCTC  
 TGGACTGCGTGGCCATGCTTATCTCCATGCGGTAGGGGTGCCGCACGGTTGCGGCACCATGCGCAATCAGCTGCAACTTTT  
 CGGCAGCGCGACAACAATTATGCGTTGCGTAAAAGTGGCAGTCAATTACAGATTTTCTTTAACCTACGCAATGAGCTATTG  
 CGGGGGGTGCCGCAATGAGCTGTTGCGTACCCCCCTTTTTTAAGTTGTTGATTTTTAAGTCTTTCGCATTTCCGCCATAT  
 CTAGTTCTTTGGTGCCCAAAGAAGGGCACCCCTGCGGGGTTCCCCCACGCTTCGCGCGGGCTCCCCCTCCGGCAAAAAGT  
 GGCCCCCTCCGGGGCTTGTGATCGACTGCGCGGCCCTTCGGCCTTGCCCAAGGTGGCGCTGCCCCCTTGGAACCCCGCACT  
 CGCCGCGGTGAGGCTCGGGGGCAGGCGGGCGGGCTTCGCCCTTCGACTGCCCCACTCGCATAGGCTTGGGTGCTTCCAG  
 GCGCGTCAAGGCCAAGCCGCTGCGCGGTGCTGCGCGAGCCTTGACCCGCTTCCACTTGGTGTTCAACCGGCAAGCGAAG  
 CGCGCAGGCCGAGGCCGAGGCTTTTCCCCAGAGAAAATTAAAAAAATTGATGGGGCAAGGCCGAGGCCGCGCAGTTGG  
 AGCCGGTGGGTATGTGGTCAAGGCTGGGTAGCCGGTGGGCAATCCCTGTGGTCAAGCTCGTGGGCAGGCCGAGCCTGTCC  
 ATCAGCTTGTCCAGCAGGTTGTCCACGGGCCGAGCGAAGCGAGCCAGCCGGTGGCCGCTCGCGGCCATCGTCCACATATC  
 CACGGGCTGGCAAGGGAGCGCAGCGACCGCGCAGGGCGAAGCCCGGAGAGCAAGCCCGTAGGGGGGGCGCGCCAGCTGTC  
 TAGGGCGGCGGATTTGTCTACTCAGGAGAGCGTTCACCGACAAACAACAGATAAAACGAAAGGCCAGTCTTTCGACTGA  
 GCCTTTCGTTTTATTGATGCCT

**Figure S2.** Nucleotide sequence of pSEVA237*Pa*. Hybridation sequences of oligonucleotides used to clone *P<sub>a</sub>* into pSEVA237 backbone are underlined and restriction enzyme sites are shown in bold.

TTAATTAAAGCGGATAACAATTTTACACAGGAGGCCGCTAGGCCGCGGCCGCGC**GAATTC**CTAGGCAGCACCATCCGCCC  
 CCCGCCCCGTCGGCACCGGCTCCGGGCACATAGGCATCCCCGCCCGGCGCACGCCCCGGATCAAACCCCAGCACATCACACG  
 CGAAGGCGATCCATGCATCCGGATCCGGAACATCGAGCCCGACATAGCCCGAGACCAGAAATTTCCATGCACCTCTCCCAAA  
 AAACGCACTTTTCGATACTATTGGTACTGTTATTAGGAGTCAAGAGACCCGGCCAGCAGATTGTGCCATGAACACAGGGCTG  
 GACAGACAGAAATTTTATAGGTACCGACAGTTTCGTTAATGGCAACTCCGGCGCGCAACC**GTCGAC**CTGCAGGCATGCAAG  
 CTTAGGAGGAAAAACATATGAGTAAAGGAGAAGAACTTTTCACTGGAGTTGTCCCAATTCTTGTGTAATTAGATGGTGATG  
 TTAATGGGCACAAATTTTCTGTCACTGGAGAGGGTGAAGGTGATGCAACATACGGAAACTTACCCTTAAATTTATTTGCA  
 CTACTGGAAACTACCTGTTCCATGGCCAACACTTGTCACTACTTTGACTTATGGTGTTCAATGCTTTTCAAGATACCCAG  
 ATCATATGAAACGGCATGACTTTTTCAAGAGTGCCATGCCCCGAAGGTTATGTACAGGAAAGAACTATATTTTTTCAAAGATG  
 ACGGGAACACTACAAGACACGTGCTGAAGTCAAGTTTGAAGGTGATACCCCTTGTTAATAGAATCGAGTTAAAAGGTATTGATT  
 TTAAAGAAGATGGAACATTCTTGGACACAAATTGGAATACAACATAACTCACACAATGTATACATCATGGCAGACAAAC  
 AAAAGAATGGAATCAAAGTTAACTTCAAATTAGACACAACATTGAAGATGGAAGCGTTCAACTAGCAGACCATTATCAAC  
 AAAATACTCCAATTGGCGATGGCCCTGTCTTTTACCAGACAACCATTACCTGTCCACACAATCTGCCCTTTCGAAAGATC  
 CCAACGAAAAGAGAGACCACATGGTCCTTCTTGAGTTTGTAACAGCTGCTGGGATTACACATGGCATGGATGAACATATA  
 AATAGCATTCGTATGTCTGCTATTTTCGCGTATAGAAGTAGTCTTGACTCCTGTTGATAGATCCAGTAATGACCTCAGAAC  
 TCCATCTGGATTTGTTTCAGAACGCTCGGTTGCCGCGGGCGTTTTTTATTGGTGAGAATCCAGGGGTCCCCAATAATTACG  
 ATTTAAATTTGTGTCTCAAAATCTCTGATGTTACATTGCACAAGATAAAAAATATATCATCATGAACAATAAACTGTCTGC  
 TTACATAAACAGTAATACAAGGGGTGTTATGAGCCATATTACGCGTGAAACGAGCTGTAGCCGTCCGCGTCTGAACAGCAA  
 CATGGATGCGGATCTGTATGGCTATAAATGGGCGCGTGATAACGTGGGTGAGAGCGGCGCGACCATTATCGTCTGTATGG  
 CAAACCGGATGCGCCGGAACCTGTTTCTGAAACATGGCAAAGGCAGCGTGCGGAACGATGTGACCGATGAAATGGTGCGTCT  
 GAACTGGCTGACCGAATTTATGCCGCTGCCGACCATTAAACATTTTATTTCGCACCCCGGATGATGCGTGGCTGCTGACCAC  
 CGCGATTCCGGGCAAAACCGCGTTTTCAGGTGCTGGAAGAATATCCGGATAGCGGCGAAAACATTGTGGATGCGCTGGCCGT  
 GTTTCTGCGTCTGCTGCATAGCATTCCGGTGTGCAACTGCCCGTTTAAACAGCGATCGTGTGTTTCTGCTGGCCAGGCGCA  
 GAGCCGTATGAACAACGGCCTGGTGGATGCGAGCGATTTTGATGATGAACGTAACGGCTGGCCGGTGGAAACAGGTGTGGAA  
 AGAAATGCATAAACTGCTGCCGTTTAGCCCGGATAGCGTGGTGACCCACGGCGATTTTAGCCTGGATAACCTGATTTTCGA  
 TGAAGGCAAACTGATTGGCTGCATTGATGTGGGCGGTGTGGGCATTGCGGATCGTTATCAGGATCTGGCCATTCTGTGGAA  
 CTGCCTGGGCGAATTTAGCCCGAGCCTGCAAAAACGTCTGTTTCAGAAAATATGGCATTGATAATCCGGATATGAACAACT  
 GCAATTTTCATCTGATGCTGGATGAATTTTCTAATAATTAATTGGACCGCGGTCCGCGCGTTGTCTTTTCCGCTGCATAA  
 CCCTGCTTCGGGGTCATTATAGCGATTTTTTTCGGTATATCCATCCTTTTTTCGCACGATATACAGGATTTTGCCAAAGGGTT  
 CGTGTAGACTTTTCTTGGTGTATCCAACGGCGTCAGCCGGGCAGGATAGGTGAAGTAGGCCACCCGCGAGCGGGTGTTC  
 TTCTTCACTGTCCCTTATTTCGCACCTGGCGGTGCTCAACGGGAATCCTGCTCTGCGAGGCTGGCCGTAGGCCGGCCCTACC  
 GGCGCGGCAGCGTTACCCGTGTGCGCGGCTCCAACGGCTCGCCATCGTCCAGAAAAACACGGCTCATCGGGCATCGGCAGGC  
 GCTGCTGCCCCGCGCCGTTCCCATTTCTCCGTTTTCGGTCAAGGCTGGCAGGTCTGGTTCCATGCCCGGAATGCCGGGCTGGC  
 TGGGCGGCTCCTCGCCGGGGCCGGTTCGGTAGTTGCTGCTCGCCCGGATACAGGGTTCGGGATGCGGCGCAGGTGCGCATGCC  
 CCAACAGCGATTTCGTCTGGTTCGTGATCAACCACCACGGCGGCACTGAACACCGACAGGCGCAACTGGTCGCGGGGCT  
 GGCCCCACGCCACGCGGTTCATTGACCACGTAGGCCGACACGGTGCCGGGGCCGTTGAGCTTCACGACGGAGATCCAGCGCT  
 CGGCCACCAAGTCCTTGACTGCGTATTGGACCGTCCGCAAAAGACGTCCGATGAGCTTGGAAGTGTCTTCTGGCTGACCA  
 CCACGGCGTTCTGGTGGCCCATCTGCGCCACGAGGTGATGCAGCAGCATTGCCGCCGTGGGTTTCTCGCAATAAGCCCGG  
 CCCACGCCTCATGCGCTTTGCGTTTCCGTTTGCACCCAGTGACCGGCTTGTCTTGGCTTGAATGCCGATTTCTCTGGACT  
 GCGTGGCCATGCTTATCTCCATGCGGTAGGGGTGCCGCACGGTTGCGGCACCATGCGCAATCAGCTGCAACTTTTTCGGCAG  
 CGCGACAACAATTATGCGTTGCGTAAAAGTGGCAGTCAATTACAGATTTTCTTTAACCTACGCAATGAGCTATTGCGGGGG  
 GTGCCGCAATGAGCTGTTGCGTACCCCCCTTTTTTAAGTTGTTGATTTTAAAGTCTTTCGCATTTTCGCCCTATATCTAGTT  
 CTTTGGTGCCCAAGAAGGGCACCCCTGCGGGGTTCCCCCACGCCTTCGGCGCGGCTCCCCCTCCGGCAAAAAGTGCCCCC  
 TCCGGGGCTTGTGATCGACTGCGCGGCCCTTCGGCCTTGCCCAAGGTGGCGCTGCCCCCTTGGAACCCCCGCACTCGCCGC  
 CGTGAGGCTCGGGGGCAGGCGGGCGGGCTTCGCCCTTCGACTGCCCCACTCGCATAGGCTTGGGTCGTTCCAGGCGCGT  
 CAAGGCCAAGCCGCTGCGCGGTGCTGCGCGAGCCTTGACCCGCTTCCACTTGGTGTTCAACCGGCAAGCGAAGCGCGCA  
 GGCCGCAGGCCGGAGGCTTTTCCCCAGAGAAAATTAATAAAATTTGATGGGGCAAGGCCGAGGCCGCGCAGTTGGAGCCGG  
 TGGGTATGTGGTCAAGGCTGGGTAGCCGGTGGGCAATCCCTGTGGTCAAGCTCGTGGGCGAGCGCAGCTGTCCATCAGC  
 TTGTCCAGCAGGGTTGTCCACGGGCCGAGCGAAGCGAGCCAGCCGGTGGCCGCTCGCGGCCATCGTCCACATATCCACGGG  
 CTGGCAAGGGAGCGCAGCGACCGCGCAGGGCGAAGCCCGGAGAGCAAGCCCGTAGGGGGGGCGCGCCAGCTGTCTAGGGC  
 GGCGGATTTGTCTACTCAGGAGAGCGTTACCCGACAAACAACAGATAAAACGAAAGGCCAGTCTTTCGACTGAGCCTTT  
 CGTTTTATTTGATGCCT

**Figure S3.** Nucleotide sequence of pSEVA237*Pb*. Hybridization sequences of oligonucleotides used to clone *P<sub>b</sub>* into pSEV237 backbone are underlined and restriction enzyme sites are shown in bold.

TTAATTAAAGCGGATAACAATTTACACAGGAGGCCGCTAGGCCGCGGCCGCGC**GAATTC**CTAATCGTCGTAGATGGCGG  
AAACCGCGGGCGGGATTCTGTTCGCATGCCCTGACAGCGGAAGTAGGAAAAGCGGTTCGTTCGCATAACGCCCCGACGGAGCGCT  
GCAGCGCGTCTCTGCTCTTCCGATATGCTGAGGTCCATCCCGCTCTTCTCCCATCCGGTTGCGCGCCGGAGTTGCCATTAAC  
GAAACTGTCCGTACCTATAAAATTTCTGTCTGTCCAGCCCTGTGTTTCATGGCACAATCTGCTGGCCGGGTCTCTTGACTCC  
TAATAACAGTACCAATAGTATCGAAAGTGCCTTTTT**GTCGA**CCTGCAGGCATGCAAGCTTAGGAGGAAAAACATATGAGT  
AAAGGAGAAGAAGCTTTTCACTGGAGTTGTCCCAATTCTTGTGTAATTAGATGGTGATGTTAATGGGCACAAATTTTCTGTC  
AGTGGAGAGGGTGAAGGTGATGCAACATACGGAAAACTTACCCTTAAATTTATTTGCACTACTGGAAAACTACCTGTTCCA  
TGGCCAACACTTGTCACTACTTTGACTTATGGTGTTCATGCTTTTCAAGATACCCAGATCATATGAAACGGCATGACTTT  
TTCAAGAGTGCCATGCCCCAAGGTTATGTACAGGAAAGAACTATATTTTCAAAGATGACGGGAACACAAGACACGTGCT  
GAAGTCAAGTTTGAAGGTGATACCCCTGTTAATAGAATCGAGTTAAAAGGTATTGATTTTAAAGAAGATGGAAACATTCTT  
GGACACAAATTGGAATACAACATAACTCACACAATGTATACATCATGGCAGACAAACAAAAGAATGGAATCAAAGTTAAC  
TTCAAATTAGACACAACATTGAAGATGGAAGCGTTCAACTAGCAGACCATTATCAACAAAATACTCCAATTGGCGATGGC  
CCTGTCTCTTTTACCAGACAACCATTAACCTGTCCACACAATCTGCCCTTTCGAAAGATCCCAACGAAAAGAGAGACCACATG  
GTCCTTCTTGAGTTTGTAAACAGCTGCTGGGATTACACATGGCATGGATGAACATAACAAATAGCATTCGTATGTCTGCTAT  
TTCGCGTATAGAACTAGTCTTGGAAGTCTGTTGATAGATCCAGTAATGACCTCAGAACTCCATCTGGATTTGTTCAGAACG  
CTCGGTGCGCGCCGGGCGTTTTTTATTGGTGAGAATCCAGGGGTCCCAATAATTACGATTTAAATTTGTGTCTCAAATC  
TCTGATGTTACATTGCACAAGATAAAAATATATCATCATGAACAATAAACTGTCTGCTTACATAAACAGTAATACAAGGG  
GTGTTATGAGCCATATTGAGCGTGAAACGAGCTGTAGCCGTCCGCGTCTGAACAGCAACATGGATGCGGATCTGTATGGCT  
ATAAATGGGCGCGTGATAACGTGGGTGAGAGCGGCGGACCATTTATCGTCTGTATGGCAAACCGGATGCGCCGGAACGTG  
TTCTGAAACATGGCAAAGGCAGCGTGGCGAACGATGTGACCGATGAAATGGTGGTCTGAACTGGCTGACCGAATTTATGC  
CGCTGCCGACCATTAACATTTTTATTTCGACCCCGGATGATGCGTGGCTGCTGACCACCGCGATTCCGGGCAAACCGCGT  
TTCAGGTGCTGGAAGAATATCCGGATAGCGGCGAAAACATTGTGGATGCGCTGGCCGTGTTTCTGCGTCTGCTGCATAGCA  
TTCCGGTGTGCAACTGCCCGTTTAAACAGCGATCGTGTGTTTCTGCTGCGCCAGGCGCAGAGCCGTATGAACAACGGCCTGG  
TGGATGCGAGCGATTTTGTATGATGAACGTAACGGCTGGCCGGTGGAAACAGGTGTGGAAAAGAAATGCATAAACTGCTGCCGT  
TTAGCCCGGATAGCGTGGTGACCCACGGCGATTTTAGCCTGGATAACCTGATTTTCGATGAAGGCAAACCTGATTGGCTGCA  
TTGATGTGGGCGGTGTGGGCATTGCGGATCGTTATCAGGATCTGGCCATTCTGTGGAACGCTGGGCGAATTTAGCCCGA  
GCCTGCAAAAACGTCTGTTTCAAGAAATATGGCATTGATAATCCGGATATGAACAACTGCAATTTTCATCTGATGCTGGATG  
AATTTTTTCTAATAATTAATTGGACCGCGGTCCGCGCGTTGTCTTTTCCGCTGCATAACCCCTGCTTCGGGGTCATTATAGC  
GATTTTTTTCGGTATATCCATCCTTTTTTCGCACGATATACAGGATTTTGCCAAAGGGTTTCGTGTAGACTTTCTTGGTGTAT  
CCAACGGCGTCAGCCGGGCAGGATAGGTGAAGTAGGCCACCCGCGAGCGGGTGTTCCTTCTTCACTGTCCCTTATTTCGCA  
CCTGGCGGTGCTCAACGGGAATCCTGCTCTGCGAGGCTGGCCGTAGGCCGCGCCCTACCGGCGCGGCAGCGTTACCCGTGTC  
GGCGGCTCCAACGGCTCGCCATCGTCCAGAAAAACAGGCTCATCGGGCATCGGCAGGCGCTGCTGCCGCGCGCGTTCCCAT  
TCCTCCGTTTTCGGTCAAGGCTGGCAGGTCTGGTTCCATGCCCGGAATGCCGGGCTGGCTGGGCGGCTCCTCGCCGGGGCCG  
GTCGGTAGTTGCTGCTCGCCCGGATACAGGGTCGGGATGCGGCGCAGGTGCCCATGCCCCAACAGCGATTCTGCTCTGGTGC  
TCGTGATCAACCACCACGGCGGCACTGAACACCGACAGGCGCAACTGGTCGCGGGGCTGGCCCCACGCCACGCGGTCAATTG  
ACCACGTAGGCCGACACGGTGCCGGGGCGTTGAGCTTACGACAGGAGATCCAGCGCTCGGCCACCAAGTCCTTGACTGCG  
TATTGGACCGTCCGCAAAGAACGTCCGATGAGCTTGGAAAGTGCTTCTGGCTGACCACCACGGCGTTCTGGTGGCCCATC  
TGCGCCACGAGGTGATGCAGCAGCATTGCCGCCGTGGGTTTCTTCGCAATAAGCCCGGCCACGCCTCATGCGCTTTGCGT  
TCCGTTTGCACCCAGTGACCGGGCTTGTTCTTGGCTTGAATGCCGATTTCTCTGGACTGCGTGCCATGCTTATCTCCATG  
CGGTAGGGGTGCCGACGGTTGCCGCACCATGCGCAATCAGCTGCAACTTTTCGGCAGCGCGACAACAATTATGCGTTGCG  
TAAAGTGGCAGTCAATTACAGATTTTCTTTAACCTACGCAATGAGCTATTGCGGGGGTGCCGCAATGAGCTGTTGCGTA  
CCCCCTTTTTTAAGTTGTTGATTTTTTAAGTCTTTCGCATTTGCCCCATATCTAGTTCTTTGGTGCCCCAAAGAAGGGCAC  
CCCTGCGGGGTCCCCCACGCCTTCGGCGCGGCTCCCCCTCCGGCAAAAAGTGCCCCCTCCGGGGCTTGTGTGATCGACTGC  
GCGGCCTTCGGCCTTGCCCAAGGTGGCGCTGCCCCCTTGGAACCCCGCACTCGCCGCCGTGAGGCTCGGGGGGCAGGCGG  
GCGGGCTTCGCCCTTCGACTGCCCCCACTCGCATAGGCTTGGGTGCTTCCAGGCGCGTCAAGGCCAAGCCGCTGCGCGGTC  
GCTGCGCGAGCCTTGACCCGCCTTCCACTTGGTGTCCAACCGGCAAGCGAAGCGCGCAGGCCGAGGCCGAGGCTTTTCC  
CCAGAGAAAATTAAAAAAATTGATGGGGCAAGGCCGAGGCCGCGCAGTTGGAGCCGGTGGGTATGTGGTCAAGGCTGGG  
TAGCCGGTGGGCAATCCCTGTGGTCAAGCTCGTGGGCAGGCGCAGCCTGTCCATCAGCTTGTCCAGCAGGGTTGTCCACGG  
GCCGAGCGAAGCGAGCCAGCCGGTGGCCGCTCGCGGCCATCGTCCACATATCCACGGGTGGCAAGGGAGCGCAGCGACCG  
CGCAGGGCGAAGCCCGGAGAGCAAGCCCGTAGGGGGGGCGCGCCAGCTGTCTAGGGCGGCGGATTTGTCTTACTCAGGAG  
AGCGTTACCGACAAACAACAGATAAAACGAAAGGCCAGTCTTTCGACTGAGCCTTTCGTTTTATTTGATGCCT

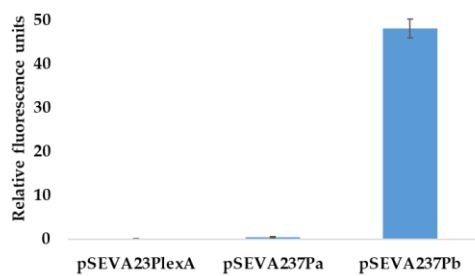

**Figure S4.** Fluorescence intensity of the *E. coli* DH10B (pSEVA23*PlexA*) as control, *E. coli* DH10B (pSEVA237*Pa*) and *E. coli* DH10B (pSEVA237*Pb*) strains carrying the transcriptional fusions of the  $P_a$ ,  $P_b$  and  $P_i$  promoter regions, respectively. The values correspond to the mean of three independent biological replicas (n=3) and error bars correspond to SD.
